# Supplementary material for: SAR of Sponge-Inspired Hemibastadin Congeners Inhibiting Blue Mussel PhenolOxidase
Source: PubMed Central journal article supplement (PMC4446618; doi:10.3390/md13053061), 2015-05-15
Supplement: marinedrugs-13-03061-s001.pdf [file marinedrugs-13-03061-s001.pdf]

## Supplementary Information

**Figure S1.**  $^1\text{H-NMR}$  spectrum of tetraiodo-norbromohemibastadin-1 (**4**)

**Figure S2.**  $^1\text{H-NMR}$  spectrum of tetrachloro-norbromohemibastadin-1 (**5**)

**Figure S3.**  $^1\text{H-NMR}$  spectrum of trimethoxy-5,5'-dibromohemibastadin-1 (**6**)

**Figure S4.**  $^1\text{H-NMR}$  spectrum of *N*-cyclohexyl-3-(3,5-dibromo-4-hydroxyphenyl)-2-(2-hydroxyimino)-propanamide (**7**)

**Figure S5.**  $^1\text{H-NMR}$  spectrum of *N*-(2-methyl-propyl)-3-(3,5-dibromo-4-hydroxyphenyl)-2-(2-hydroxyimino)-propanamide (**8**)

**Figure S6.**  $^1\text{H-NMR}$  spectrum of *N*-hexyl-3-(3,5-dibromo-4-hydroxyphenyl)-2-(2-hydroxyimino)-propanamide (**9**)

**Figure S7.**  $^1\text{H-NMR}$  spectrum of *N*-2-phenylethyl-3-(3,5-dibromo-4-hydroxyphenyl)-2-(2-hydroxyimino)-propanamide (**10**)

**Figure S8.**  $^1\text{H-NMR}$  spectrum of *N*-[2-(4-imidazolyl)-ethyl]-3-(3,5-dibromo-4-hydroxyphenyl)-2-(2-hydroxyimino)-propanamide (**11**)

**Figure S9.**  $^1\text{H-NMR}$  spectrum of *N*-[2-(3-indolyl)-ethyl]-3-(3,5-dibromo-4-hydroxyphenyl)-2-(2-hydroxyimino)-propanamide (**12**)

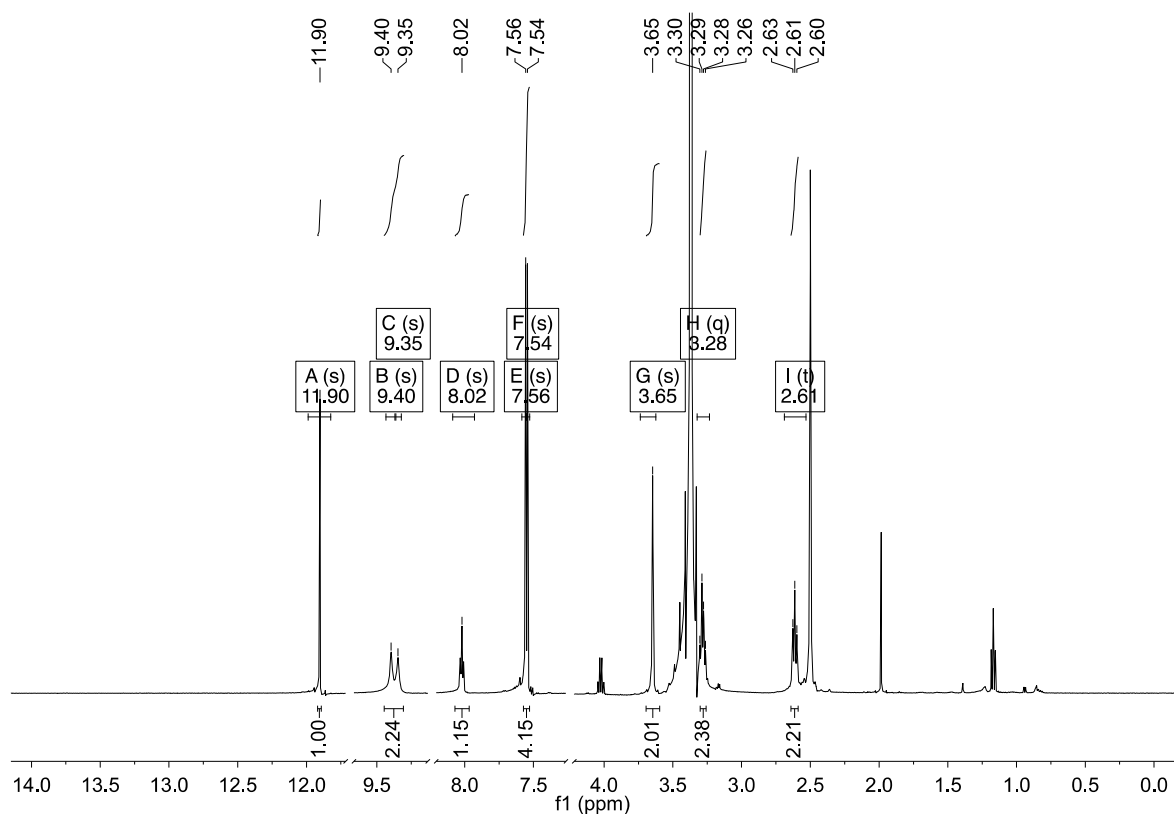

**Figure S1.**  $^1\text{H-NMR}$  spectrum of tetraiodo-norbromohemibastadin-1 (**4**).

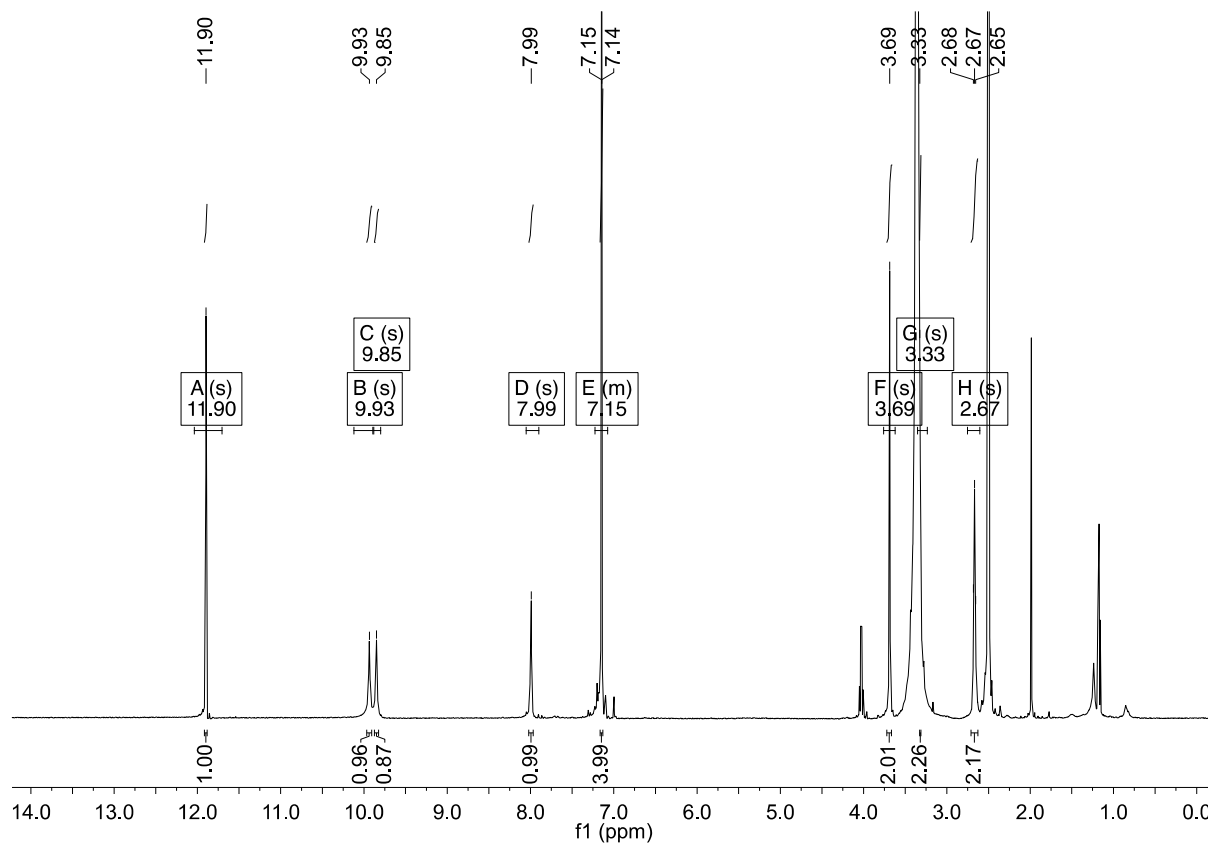

Figure S2.  $^1\text{H-NMR}$  spectrum of tetrachloro-norbromohemibastadin-1 (**5**).

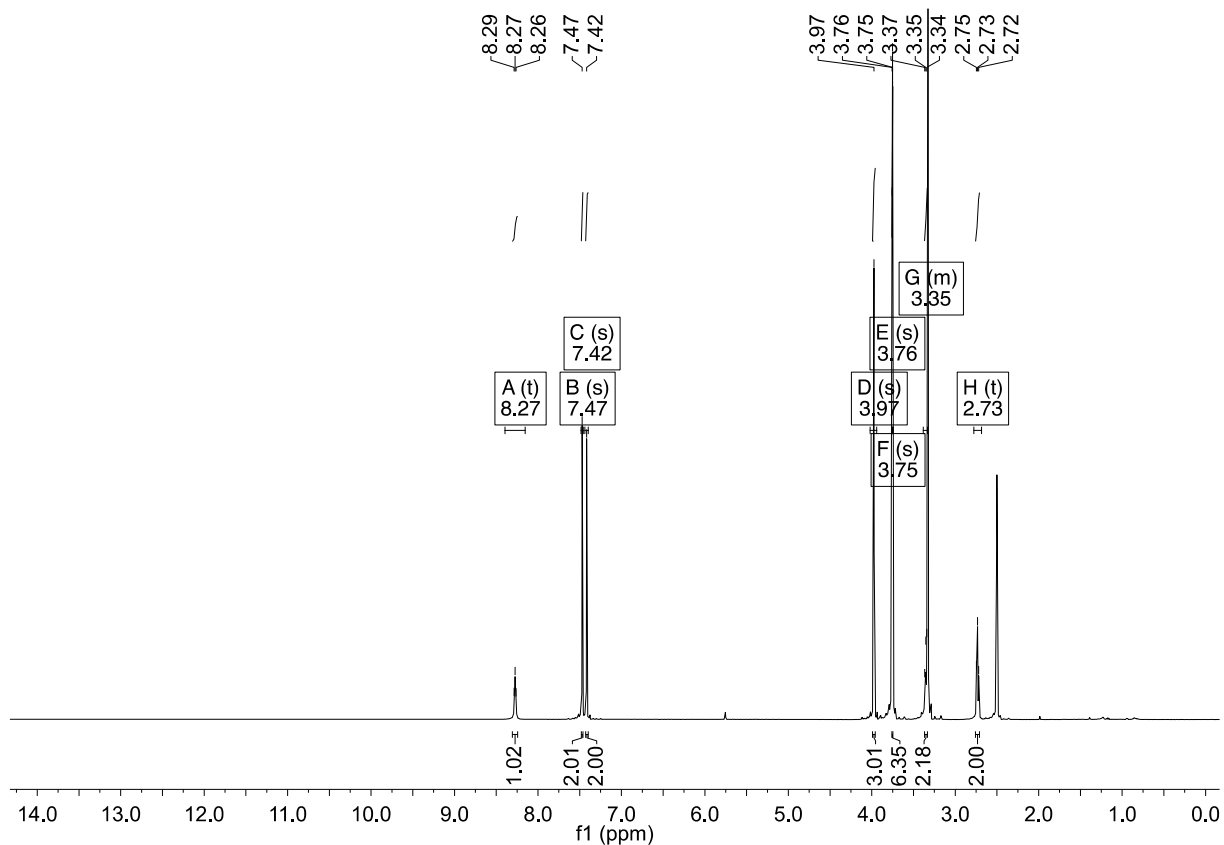

Figure S3.  $^1\text{H-NMR}$  spectrum of trimethoxy-5,5'-dibromohemibastadin-1 (**6**).

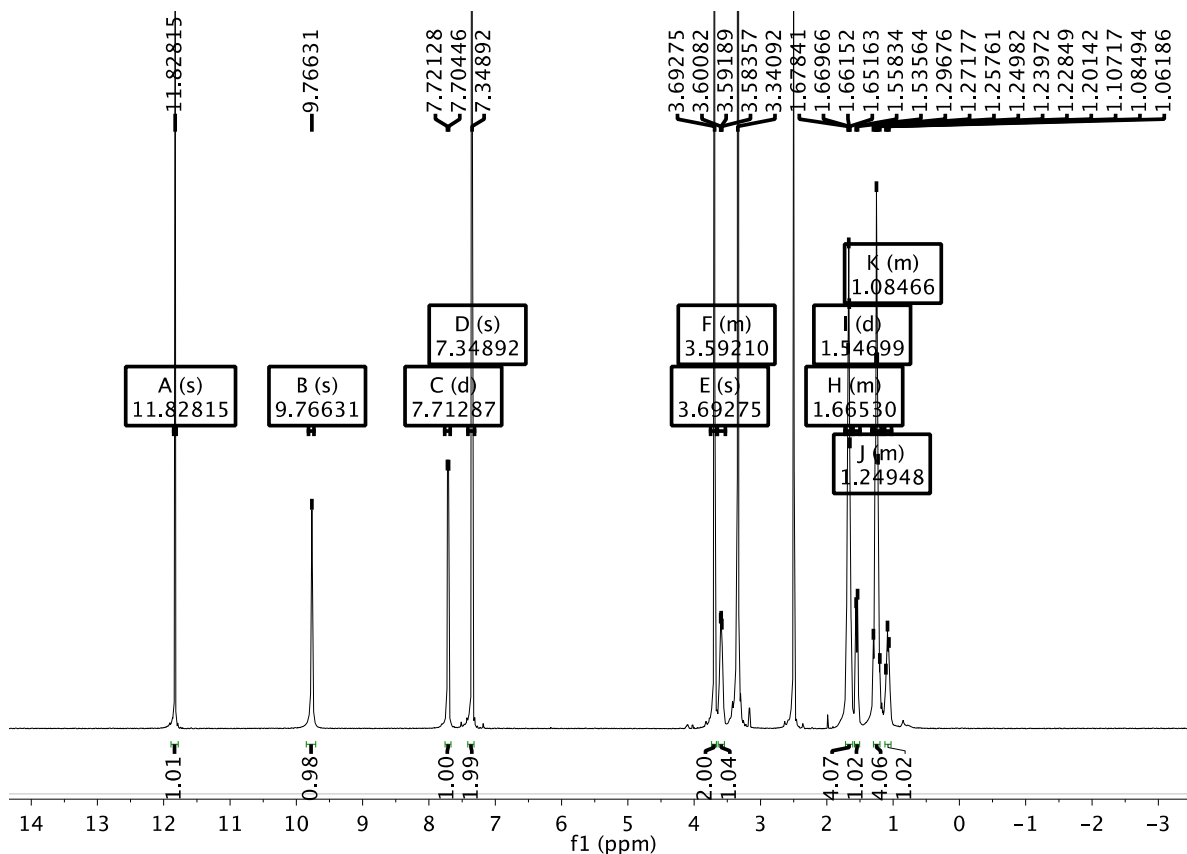

**Figure S4.**  $^1\text{H-NMR}$  spectrum of *N*-cyclohexyl-3-(3,5-dibromo-4-hydroxyphenyl)-2-(2-hydroxyimino)-propanamide (**7**).

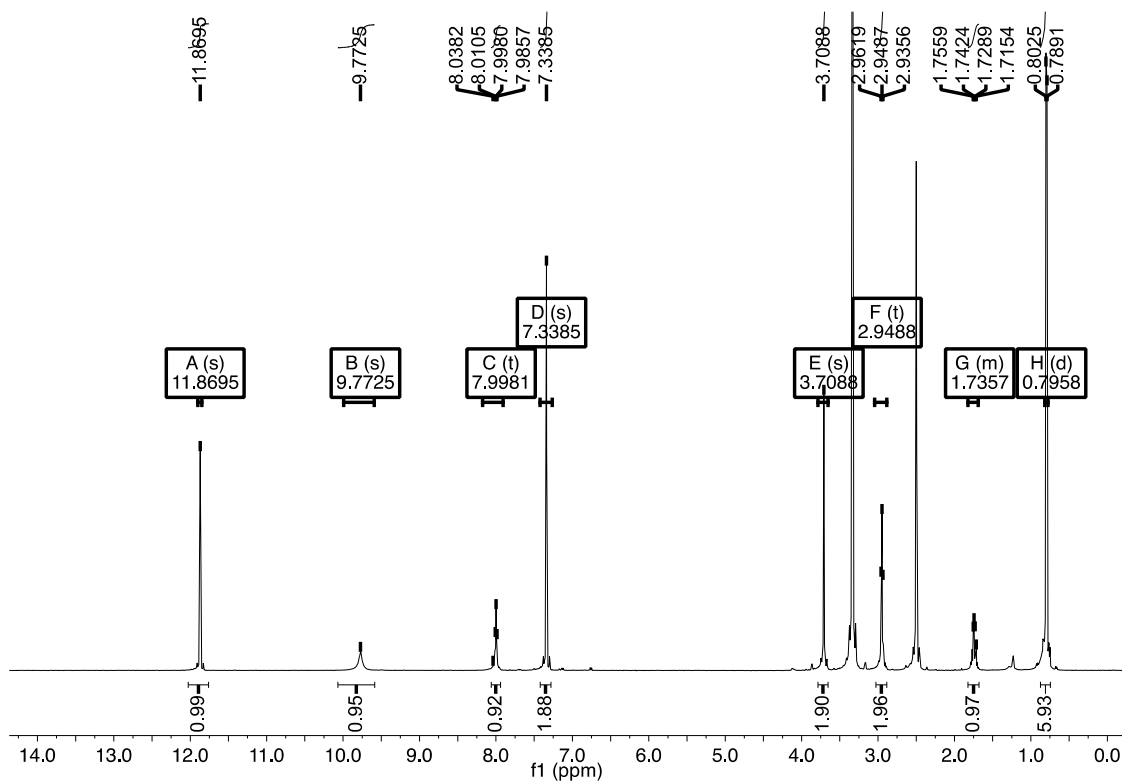

**Figure S5.**  $^1\text{H-NMR}$  spectrum of *N*-(2-methyl-propyl)-3-(3,5-dibromo-4-hydroxyphenyl)-2-(2-hydroxyimino)-propanamide (**8**).

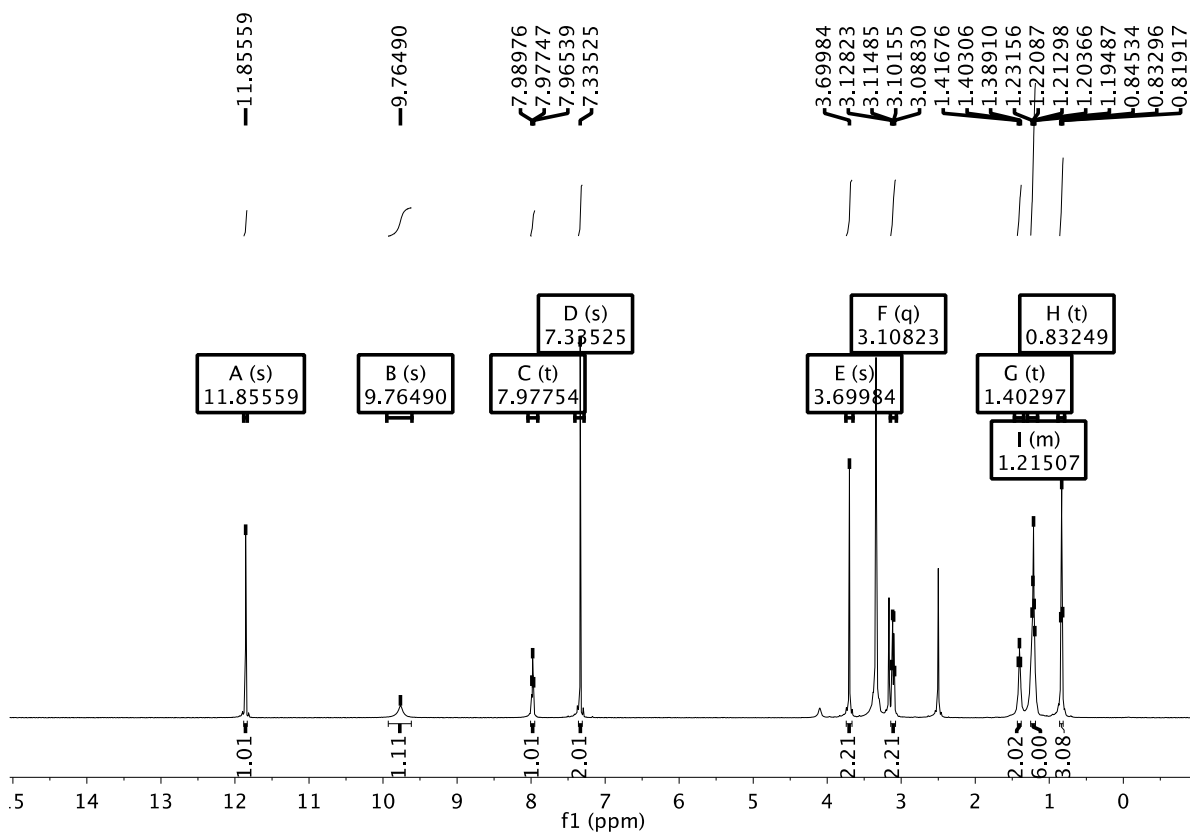

**Figure S6.**  $^1\text{H-NMR}$  spectrum of *N*-hexyl-3-(3,5-dibromo-4-hydroxyphenyl)-2-(2-hydroxyimino)-propanamide (**9**).

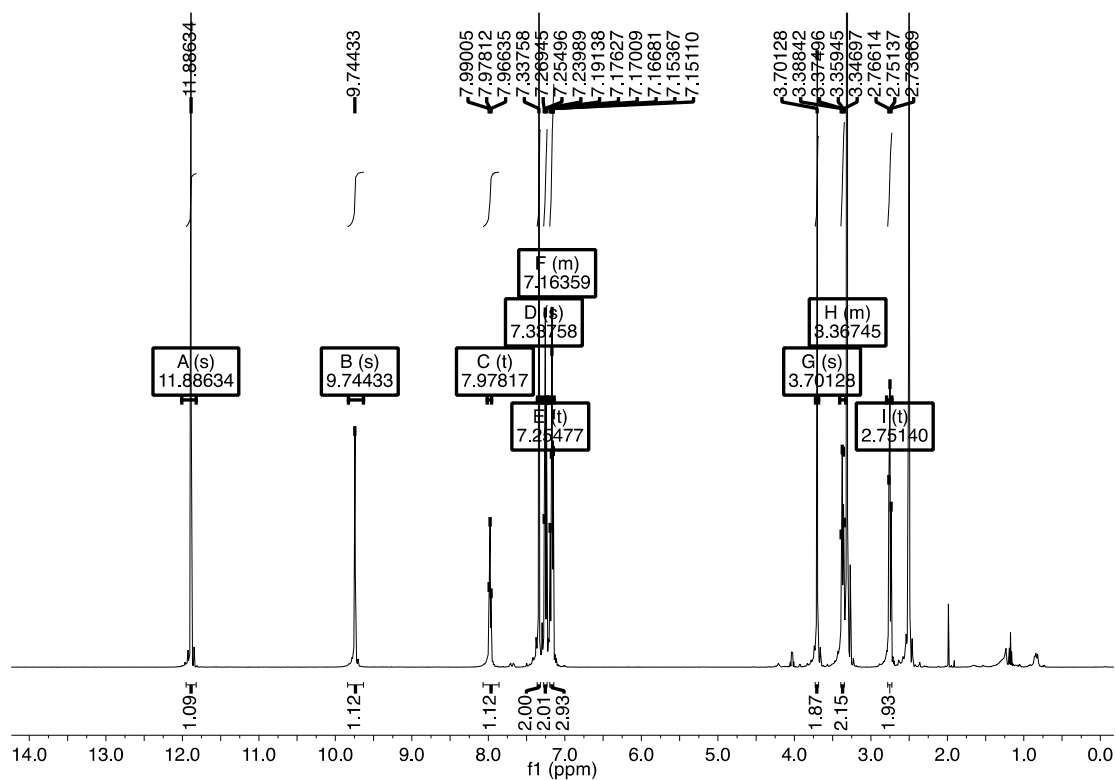

**Figure S7.**  $^1\text{H-NMR}$  spectrum of *N*-2-phenylethyl-3-(3,5-dibromo-4-hydroxyphenyl)-2-(2-hydroxyimino)-propanamide (**10**).

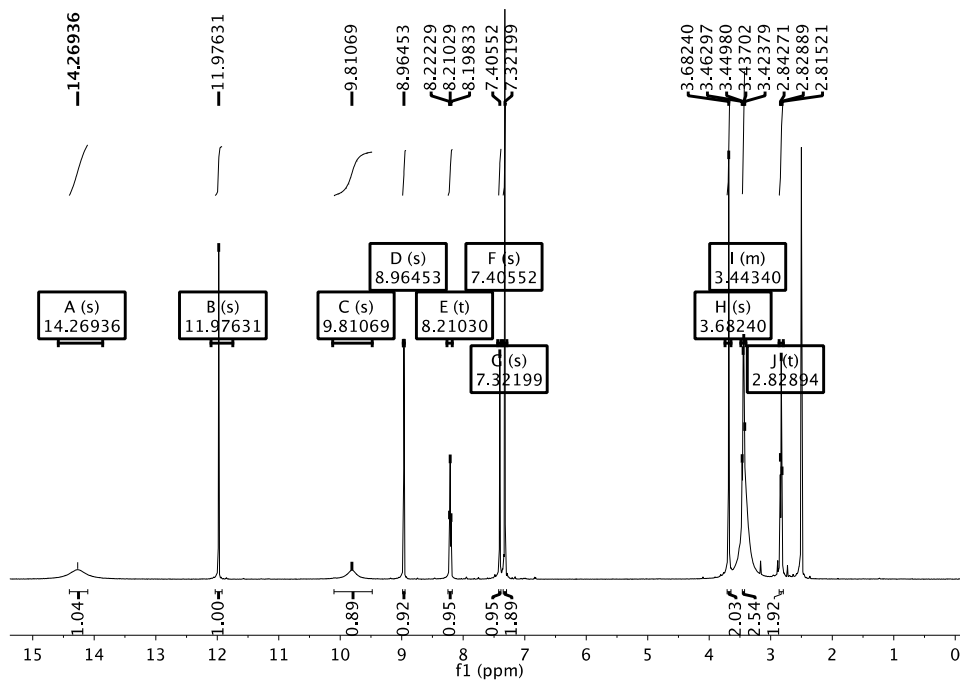

**Figure S8.**  $^1\text{H-NMR}$  spectrum of *N*-[2-(4-imidazolyl)-ethyl]-3-(3,5-dibromo-4-hydroxyphenyl)-2-(2-hydroxyimino)-propanamide (**11**).

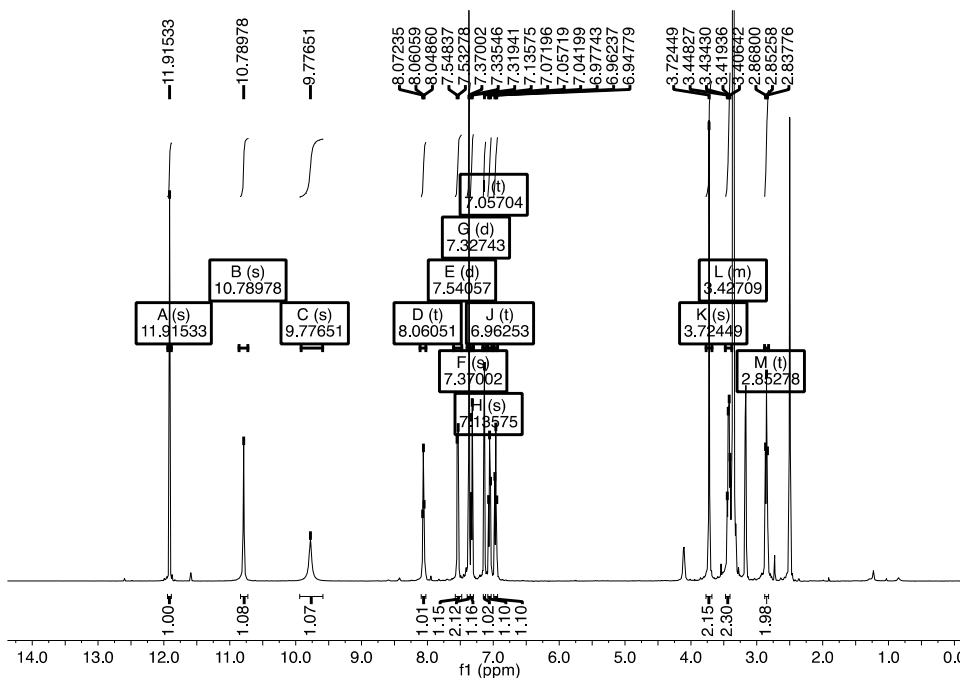

**Figure S9.**  $^1\text{H-NMR}$  spectrum of *N*-[2-(3-indolyl)-ethyl]-3-(3,5-dibromo-4-hydroxyphenyl)-2-(2-hydroxyimino)-propanamide (**12**).
